# Supplementary material for: Modified Vaccinia Virus Ankara Preferentially Targets Antigen Presenting Cells In Vitro, Ex Vivo and In Vivo
Source: PubMed Central journal article supplement (PMC5561217; doi:10.1038/s41598-017-08719-y), 2017-08-17
Supplement: 41598_2017_8719_MOESM1_ESM.pdf [file 41598_2017_8719_MOESM1_ESM.pdf]

1 **Modified Vaccinia Virus Ankara Preferentially Targets**  
2 **Antigen Presenting Cells *In Vitro*, *Ex Vivo* and *In Vivo***

3

4 *Arwen F Altenburg*<sup>1\*</sup>, *Carolien E van de Sandt*<sup>1\*</sup>, *Bobby WS Li*<sup>2</sup>, *Ronan J*  
5 *MacLoughlin*<sup>3</sup>, *Ron AM Fouchier*<sup>1</sup>, *Geert van Amerongen*<sup>4</sup>, *Asisa Volz*<sup>5,6</sup>, *Rudi W*  
6 *Hendriks*<sup>2</sup>, *Rik L de Swart*<sup>1</sup>, *Gerd Sutter*<sup>5,6</sup>, *Guus F Rimmelzwaan*<sup>1</sup>, *Rory D de Vries*<sup>1#</sup>

7

8 <sup>1</sup> Department of Viroscience, Postgraduate School of Molecular Medicine, Erasmus MC,  
9 Rotterdam, the Netherlands

10 <sup>2</sup> Department of Pulmonary Medicine, Erasmus MC, Rotterdam, the Netherlands

11 <sup>3</sup> Aerogen Ltd, IDA Business Park, Dangan, Galway, Ireland

12 <sup>4</sup> ViroClinics Biosciences BV, Rotterdam, the Netherlands

13 <sup>5</sup> Institute for Infectious Diseases and Zoonoses, LMU University of Munich, Munich,  
14 Germany

15 <sup>6</sup> German Centre for Infection Research (DZIF)

16

17 \* Authors contributed equally

18

19 # **Corresponding author:** Dr. Rory D de Vries, Department of Viroscience,  
20 Erasmus MC, PO Box 2040, 3000 CA Rotterdam, the Netherlands, email  
21 address: [r.d.devries@erasmusmc.nl](mailto:r.d.devries@erasmusmc.nl)

22

23

24 [MOVIE]

25

26 **Supplementary Figure 1. CLSM 3D render of mouse hind leg muscle.** Z-

27 stack of a hind leg muscle slice from a IM rMVA-GFP injected mouse was

28 obtained by CLSM. A 3D render of the maximum intensity projection was

29 generated using the Zen software. GFP = green. Nucleus = red.

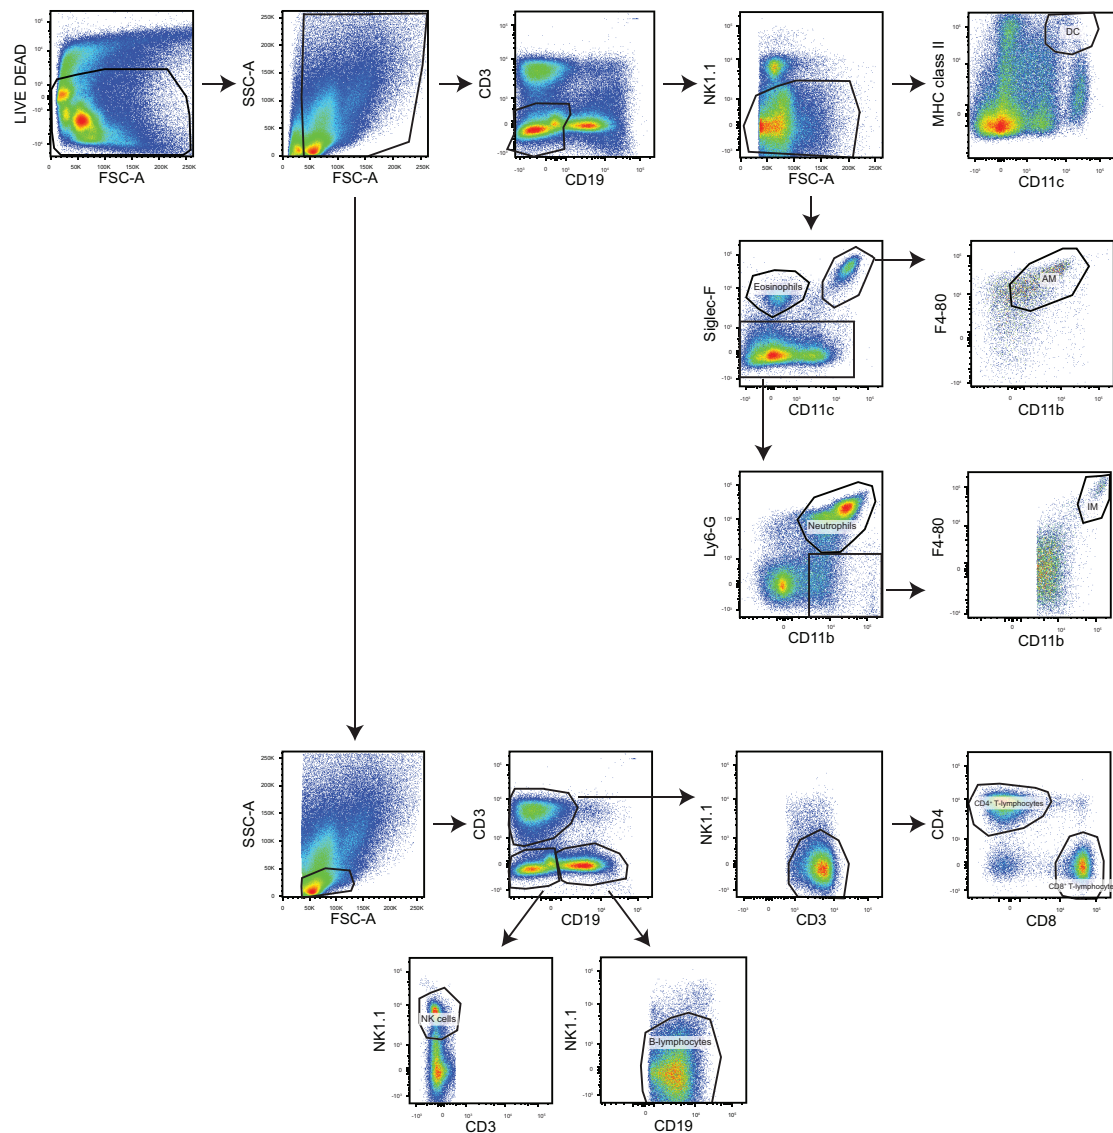

30

31 **Supplementary Figure 2. Gating strategy to define populations for**  
 32 **phenotypic analysis of GFP<sup>+</sup> cells in the lungs of mice.** Live cells were  
 33 gated followed by selection of non-lymphocytes and lymphocytes based on  
 34 the forward / sideward scatter. Subsequently, CD3<sup>-</sup> CD19<sup>-</sup> NK1.1<sup>-</sup> cells were  
 35 selected in the non-lymphocyte population. MHC class II<sup>+</sup> CD11c<sup>+</sup> cells were  
 36 defined as DC and Siglec-8<sup>+</sup> CD11c<sup>-</sup> were classified as eosinophils. Siglec-8<sup>+</sup>  
 37 CD11c<sup>+</sup> F4-80<sup>+</sup> CD11b<sup>+</sup> cells were identified as alveolar macrophages (AM).  
 38 Siglec-8-negative cells were further subdivided into a Ly6-G<sup>+</sup> CD11b<sup>+</sup>  
 39 neutrophil population and Ly6-G<sup>-</sup> CD11b<sup>+</sup> F4-80<sup>+</sup> interstitial macrophages (IM).

40 Following selection of lymphocytes in the forward / sideward scatterplot, CD3<sup>+</sup>  
41 CD19<sup>-</sup> NK1.1<sup>-</sup> cells were selected and divided into CD4<sup>+</sup> and CD8<sup>+</sup> T-  
42 lymphocytes. Furthermore, CD3<sup>-</sup> CD19<sup>-</sup> NK1.1<sup>+</sup> cells were defined as NK cells  
43 and CD3<sup>-</sup> CD19<sup>+</sup> NK1.1<sup>-</sup> cells were defined as B-lymphocytes.

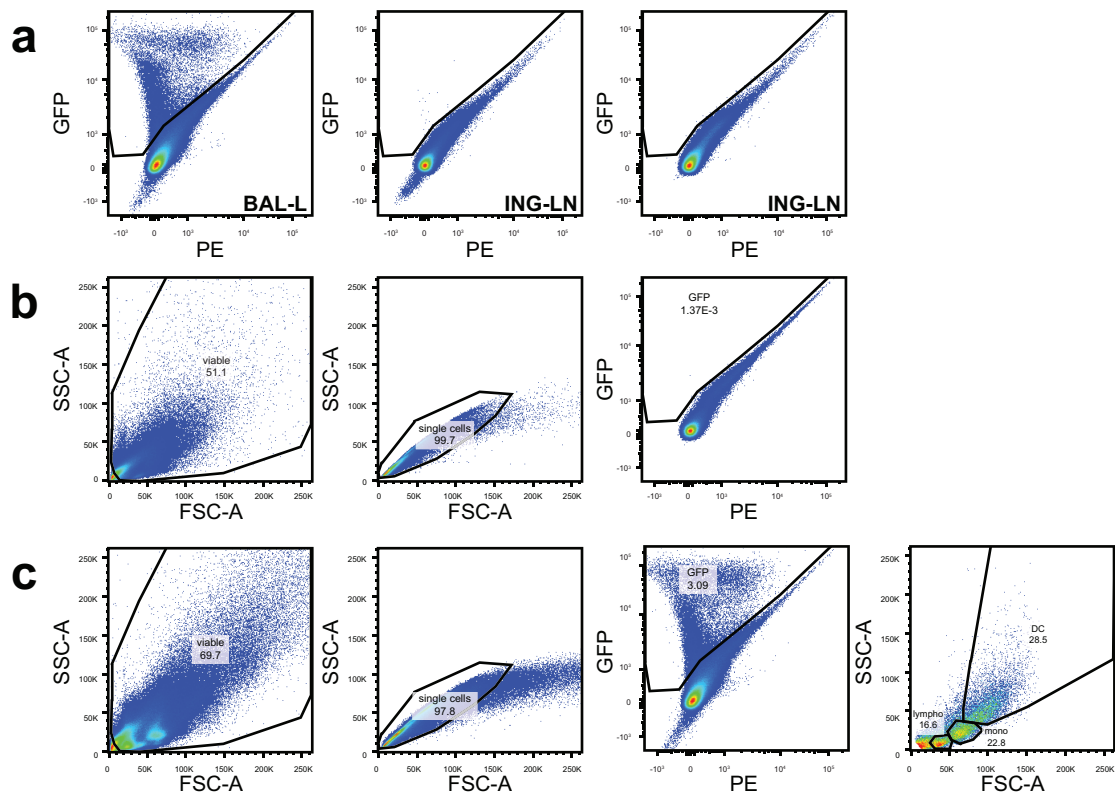

44

45 **Supplementary Figure 3. Gating strategy to detect GFP<sup>+</sup> cells in ferret**

46 **tissues. (A)** Example of detection of GFP<sup>+</sup> cells in unstained single cell  
 47 suspensions from different ferret tissues. Detection of GFP<sup>+</sup> cells in a sample  
 48 containing abundant GFP<sup>+</sup> cells (panel 1, BAL left side after IT inoculation),  
 49 background level GFP<sup>+</sup> cells (panel 2, ING-LN after IM injection) or no GFP<sup>+</sup>  
 50 cells (panel 3, ING-LN after IT inoculation) is shown. **(B-C)** Gating strategy to  
 51 define GFP<sup>+</sup> DC-like, monocyte-like and lymphocyte-like cell populations in  
 52 ferret tissues. As an example, the gating strategy of BAL is shown after IM  
 53 injection **(B, negative control)** or IT inoculation **(C)** with rMVA-GFP. First,  
 54 viable cells were gated followed by selection of single cells. Next, all GFP<sup>+</sup>  
 55 cells were selected after which lymphocyte-like, monocyte-like or DC-like cell  
 56 populations were reversely gated in the scatter plot. Gate name and  
 57 percentage of events are indicated in each gate.

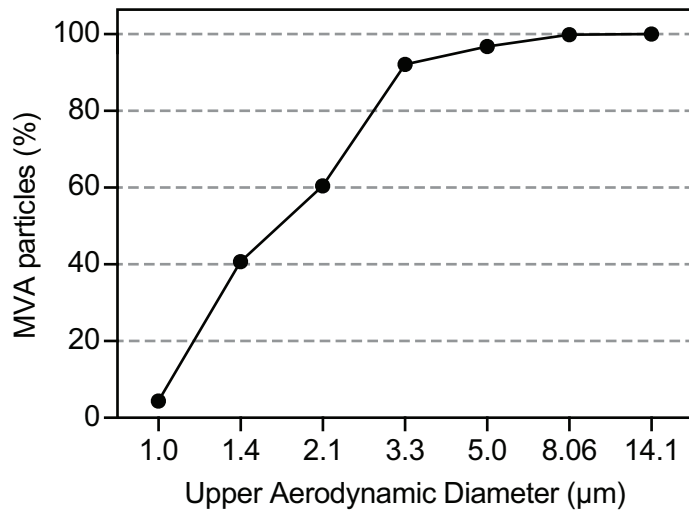

58

59 **Supplementary Figure 4. Droplet size characterization of rMVA-GFP**

60 **aerosol.** rMVA-GFP was nebulized and several droplet fractions of increasing  
61 size between 0.98 and 14.1µm in diameter were collected using a cascade  
62 impactor. Cumulative distribution of rMVA-GFP particles across the range of  
63 droplet diameters is shown.

64 [MOVIE]

65

66 **Supplementary Figure 5. CLSM 3D render of macaque lung.** Z-stack was  
67 obtained of a lung slice from a macaque that received rMVA-GFP via AER  
68 inhalation. A 3D render of the maximum intensity projection was generated  
69 using Zen software. GFP = green. Nucleus = red.

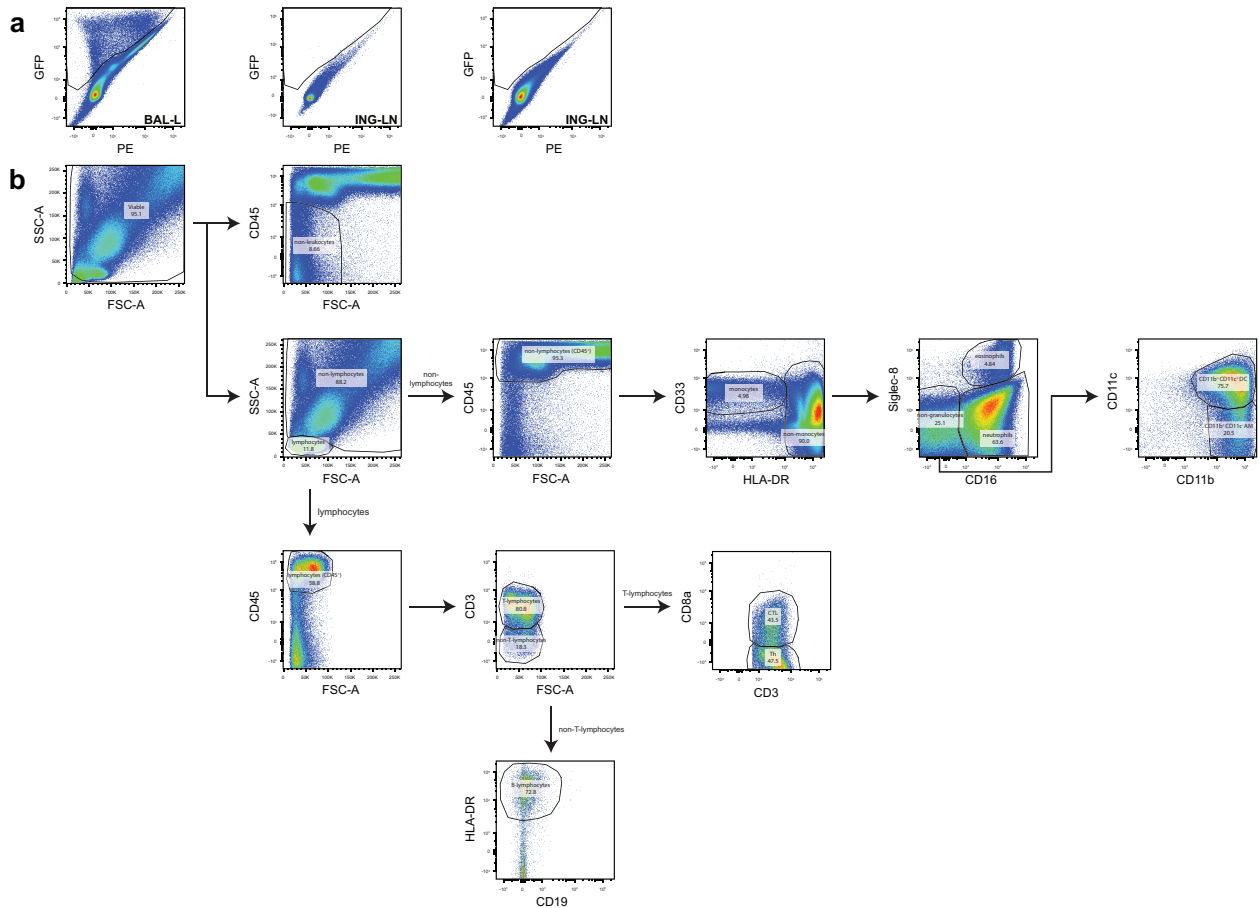

70

71 **Supplementary Figure 6. Gating strategy to detect GFP<sup>+</sup> cells in macaque tissues.**

72 (A) Example of detection of GFP<sup>+</sup> cells in unstained single cell suspensions from  
 73 different non-human primate tissues. Detection of GFP<sup>+</sup> cells in a sample containing  
 74 abundant GFP<sup>+</sup> cells (panel 1, BAL left side after AER inhalation), background level  
 75 GFP<sup>+</sup> cells (panel 2, ING-LN after IM injection) or no GFP<sup>+</sup> cells (panel 3, ING-LN after  
 76 IT inoculation) is shown. (B) Gating strategy to define populations for phenotypic  
 77 analysis of GFP<sup>+</sup> cells in BAL of macaques. Viable cells were selected after which non-  
 78 leukocyte (e.g. CD45<sup>-</sup> epithelial cells) were gated. Viable cells were further discriminated  
 79 into lymphocytes and non-lymphocytes based on FSC / SSC plot. CD45<sup>+</sup> cells outside  
 80 the lymphogate were selected in which the CD33<sup>+</sup> monocytes were gated. The HLA-



81 DR<sup>+</sup> population was divided into Siglec-8<sup>+</sup> CD16<sup>+</sup> eosinophils, Siglec-8<sup>-</sup> CD16<sup>+</sup>  
82 neutrophils and Siglec-8<sup>-</sup> CD16<sup>-</sup> non-granulocytes, which were further phenotyped into  
83 CD11b<sup>+</sup> CD11c<sup>+</sup> DC or CD11b<sup>+</sup> CD11c<sup>-</sup> AM. The CD45<sup>+</sup> lymphocytes were divided into  
84 CD3<sup>+</sup> T-lymphocytes, further discriminated into CD8<sup>+</sup> cytotoxic T-lymphocytes (CTL)  
85 and CD8<sup>-</sup> T helper (Th)-lymphocytes, and CD3<sup>-</sup> HLA-DR<sup>+</sup> B-lymphocytes. In this  
86 example CD19 staining did not work, thus was not included in the analysis. Gate name  
87 and percentage of events is indicated in each gate.
